# Supplementary material for: Magnetic mesoporous silica nanoparticles for CpG delivery to enhance cytokine induction via toll-like receptor 9
Source: Royal Society of Chemistry journal article supplement (doi:10.1039/c4ra08003c), 2014-01-01
Supplement: c4ra08003c1.pdf [file c4ra08003c1.pdf]

## Supporting Information

### **Magnetic Mesoporous Silica Nanoparticles for CpG Delivery to Enhance Cytokine Induction via Toll-like Receptor 9**

Cuilian Tao<sup>a</sup>, Yufang Zhu<sup>b\*</sup>, Xianglan Li<sup>c</sup>, Nobutaka Hanagata<sup>c</sup>

<sup>a</sup> School of Medical Instrument and Food Engineering, University of Shanghai for Science and Technology, 516 Jungong Road, Shanghai, 200093, China.

<sup>b</sup> School of Materials Science and Engineering, University of Shanghai for Science and Technology, 516 Jungong Road, Shanghai, 200093, China.

<sup>c</sup> Nanotechnology Innovation Station, National Institute for Materials Science, 1-2-1 Segen, Tsukuba, Ibaraki 305-0047, Japan.

\*Corresponding authors: Yufang Zhu

Tel: +86-21-55271663;

Email: [zjf2412@163.com](mailto:zjf2412@163.com)

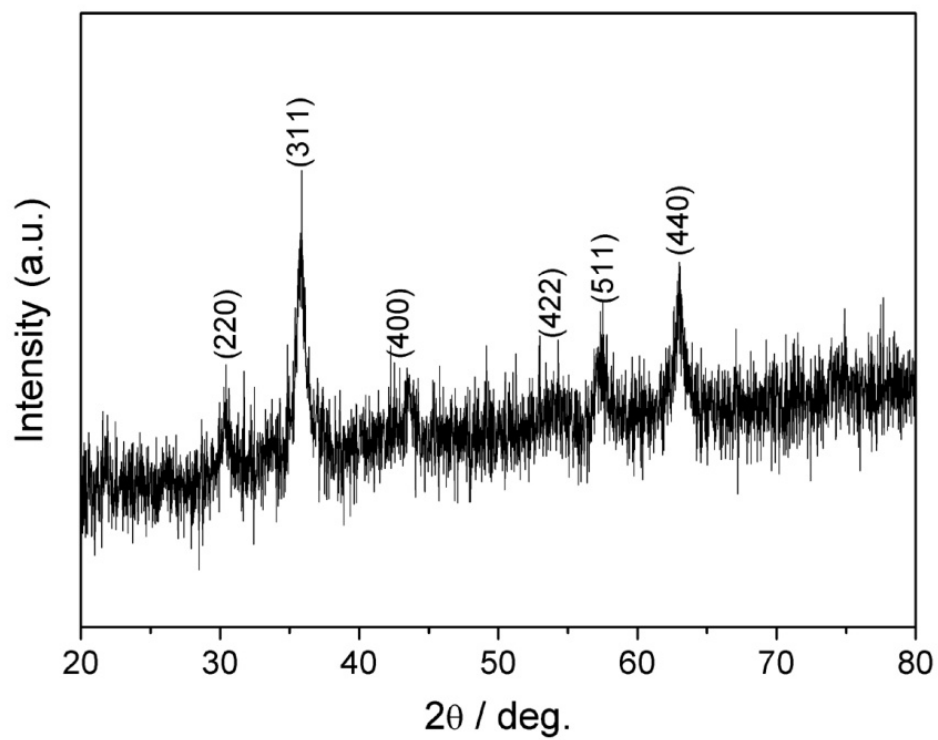

Fig. S1 Wide angle XRD pattern of Fe<sub>3</sub>O<sub>4</sub> nanoparticles

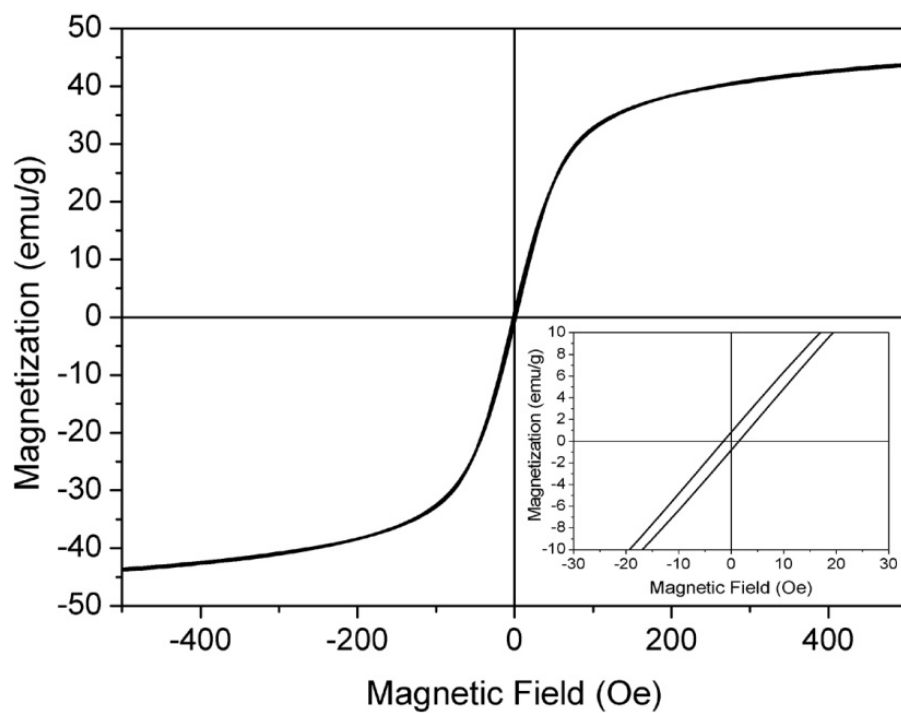

Fig. S2 Magnetization curve of Fe<sub>3</sub>O<sub>4</sub> nanoparticles measured at 298 K.

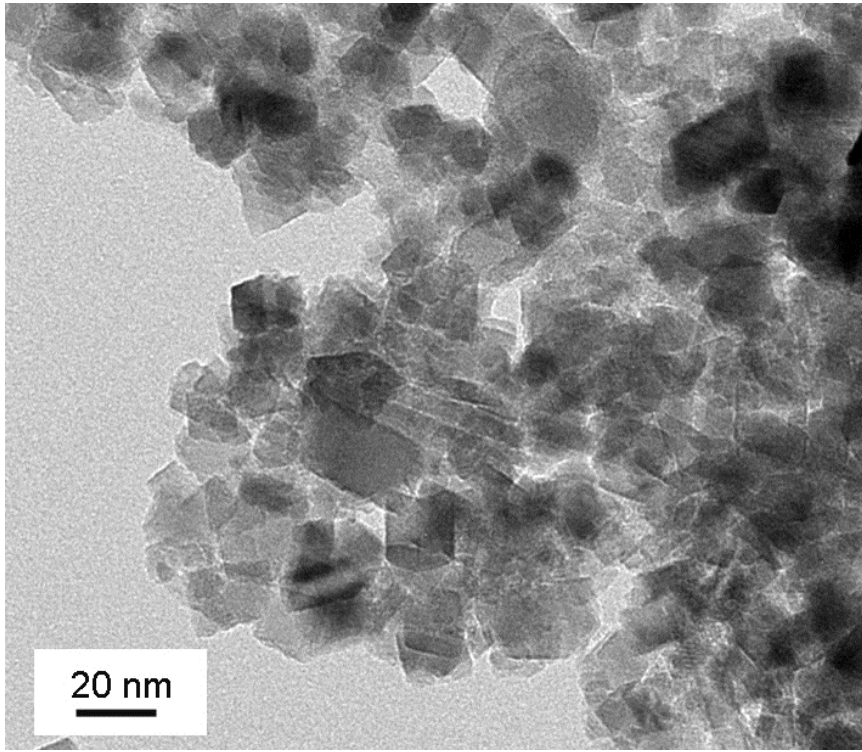

Fig. S3 TEM image of Fe<sub>3</sub>O<sub>4</sub> nanoparticles.

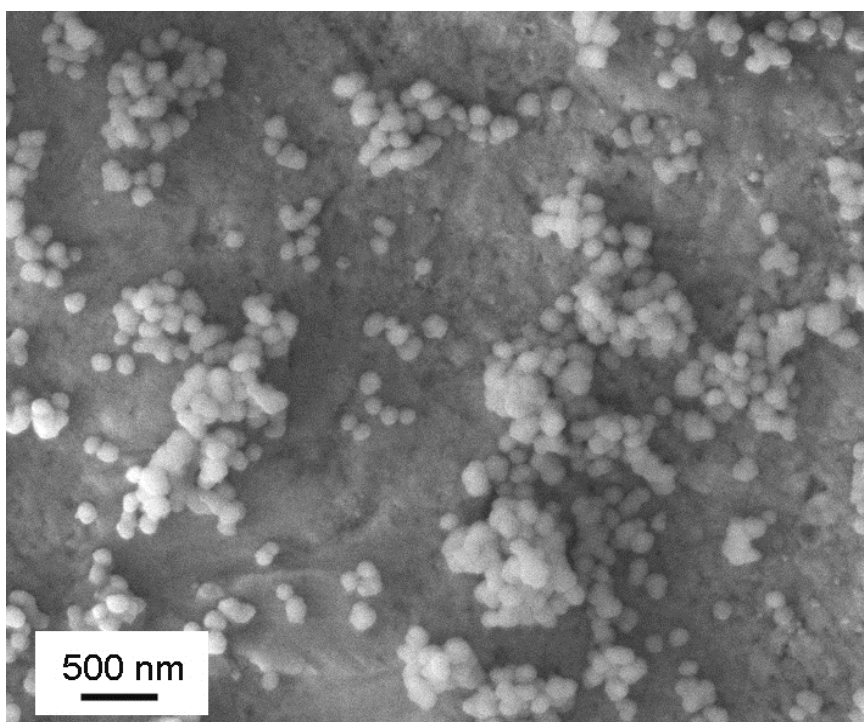

Fig. S4 SEM image of MMS nanoparticles
